# Supplementary material for: Comparing Five Comorbidity Indices to Predict Mortality in Chronic Kidney Disease: A Retrospective Cohort Study
Source: PubMed Central journal article supplement — Can J Kidney Health Dis. 2018 Oct 15;5:2054358118805418. doi: 10.1177/2054358118805418 (PMC6195002; doi:10.1177/2054358118805418), 2018-10-15
Supplement: Appendix_2018_06_05.pdf [file Appendix_2018_06_05.pdf]

**Comparing five comorbidity indices to predict mortality in chronic kidney disease: a retrospective cohort study**

Eric McArthur MSc<sup>1</sup>, Sarah E Bota BA<sup>1</sup>, Manish M Sood MD MSc<sup>1,2</sup>, Gihad E Nesrallah MD<sup>3,4</sup>,  
S Joseph Kim MD PhD<sup>1,5</sup>, Amit X Garg MD PhD<sup>1,3,6,7</sup>, Stephanie N Dixon PhD<sup>1,7</sup>

Table S1. Transparent reporting of a multivariable prediction model for individual prognosis or diagnosis (TRIPOD) checklist

| Section/Topic                | Item | Checklist Item                                                                                                                                                                                   | Page |
|------------------------------|------|--------------------------------------------------------------------------------------------------------------------------------------------------------------------------------------------------|------|
| <b>Title and abstract</b>    |      |                                                                                                                                                                                                  |      |
| Title                        | 1    | Identify the study as developing and/or validating a multivariable prediction model, the target population, and the outcome to be predicted.                                                     | 1    |
| Abstract                     | 2    | Provide a summary of objectives, study design, setting, participants, sample size, predictors, outcome, statistical analysis, results, and conclusions.                                          | 2    |
| <b>Introduction</b>          |      |                                                                                                                                                                                                  |      |
| Background and objectives    | 3a   | Explain the medical context (including whether diagnostic or prognostic) and rationale for developing or validating the multivariable prediction model, including references to existing models. | 4, 5 |
|                              | 3b   | Specify the objectives, including whether the study describes the development or validation of the model or both.                                                                                | 5    |
| <b>Methods</b>               |      |                                                                                                                                                                                                  |      |
| Source of data               | 4a   | Describe the study design or source of data (e.g., randomized trial, cohort, or registry data), separately for the development and validation data sets, if applicable.                          | 5    |
|                              | 4b   | Specify the key study dates, including start of accrual; end of accrual; and, if applicable, end of follow-up.                                                                                   | 6    |
| Participants                 | 5a   | Specify key elements of the study setting (e.g., primary care, secondary care, general population) including number and location of centres.                                                     | 6    |
|                              | 5b   | Describe eligibility criteria for participants.                                                                                                                                                  | 7    |
|                              | 5c   | Give details of treatments received, if relevant.                                                                                                                                                | -    |
| Outcome                      | 6a   | Clearly define the outcome that is predicted by the prediction model, including how and when assessed.                                                                                           | 6, 7 |
|                              | 6b   | Report any actions to blind assessment of the outcome to be predicted.                                                                                                                           | -    |
| Predictors                   | 7a   | Clearly define all predictors used in developing or validating the multivariable prediction model, including how and when they were measured.                                                    | 7    |
|                              | 7b   | Report any actions to blind assessment of predictors for the outcome and other predictors.                                                                                                       | -    |
| Sample size                  | 8    | Explain how the study size was arrived at.                                                                                                                                                       | 7    |
| Missing data                 | 9    | Describe how missing data were handled (e.g., complete-case analysis, single imputation, multiple imputation) with details of any imputation method.                                             | 8    |
| Statistical analysis methods | 10c  | For validation, describe how the predictions were calculated.                                                                                                                                    | 8    |
|                              | 10d  | Specify all measures used to assess model performance and, if relevant, to compare multiple models.                                                                                              | 8    |
|                              | 10e  | Describe any model updating (e.g., recalibration) arising from the                                                                                                                               | -    |

|                            |     |                                                                                                                                                                                                       |             |
|----------------------------|-----|-------------------------------------------------------------------------------------------------------------------------------------------------------------------------------------------------------|-------------|
|                            |     | validation, if done.                                                                                                                                                                                  |             |
| Risk groups                | 11  | Provide details on how risk groups were created, if done.                                                                                                                                             | 8           |
| Development vs. validation | 12  | For validation, identify any differences from the development data in setting, eligibility criteria, outcome, and predictors.                                                                         | 10, 11      |
| <b>Results</b>             |     |                                                                                                                                                                                                       |             |
| Participants               | 13a | Describe the flow of participants through the study, including the number of participants with and without the outcome and, if applicable, a summary of the follow-up time. A diagram may be helpful. | 9, Figure 1 |
|                            | 13b | Describe the characteristics of the participants (basic demographics, clinical features, available predictors), including the number of participants with missing data for predictors and outcome.    | 9, Table 1  |
|                            | 13c | For validation, show a comparison with the development data of the distribution of important variables (demographics, predictors and outcome).                                                        | 10, 11      |
| Model performance          | 16  | Report performance measures (with CIs) for the prediction model.                                                                                                                                      | 9, Table 2  |
| Model-updating             | 17  | If done, report the results from any model updating (i.e., model specification, model performance).                                                                                                   | -           |
| <b>Discussion</b>          |     |                                                                                                                                                                                                       |             |
| Limitations                | 18  | Discuss any limitations of the study (such as nonrepresentative sample, few events per predictor, missing data).                                                                                      | 12          |
| Interpretation             | 19a | For validation, discuss the results with reference to performance in the development data, and any other validation data.                                                                             | 10, 11      |
|                            | 19b | Give an overall interpretation of the results, considering objectives, limitations, results from similar studies, and other relevant evidence.                                                        | 12, 13      |
| Implications               | 20  | Discuss the potential clinical use of the model and implications for future research.                                                                                                                 | 13, 14      |
| <b>Other information</b>   |     |                                                                                                                                                                                                       |             |
| Supplementary information  | 21  | Provide information about the availability of supplementary resources, such as study protocol, Web calculator, and data sets.                                                                         | 15          |
| Funding                    | 22  | Give the source of funding and the role of the funders for the present study.                                                                                                                         | 15          |

Table S2. Median (interquartile range) c-statistics in the derivation sample

| <b>Comorbidity index</b>                 | <b>Kidney transplant recipient</b> | <b>Maintenance Dialysis</b> | <b>Low eGFR</b>  |
|------------------------------------------|------------------------------------|-----------------------------|------------------|
| Charlson comorbidity index               | 0.59 (0.57-0.61)                   | 0.61 (0.60-0.61)            | 0.63 (0.63-0.64) |
| ESRD-modified Charlson comorbidity index | 0.60 (0.58-0.61)                   | 0.63 (0.62-0.63)            | 0.63 (0.63-0.64) |
| Johns Hopkins' ADG score                 | 0.57 (0.56-0.60)                   | 0.64 (0.64-0.64)            | 0.66 (0.65-0.66) |
| Elixhauser score                         | 0.56 (0.54-0.58)                   | 0.62 (0.62-0.62)            | 0.63 (0.63-0.63) |
| Wright-Khan index                        | 0.63 (0.61-0.65)                   | 0.63 (0.63-0.63)            | 0.64 (0.64-0.64) |
